# Supplementary material for: Surface chemistry of MgO/SiO2 catalyst during the ethanol catalytic conversion to 1,3-butadiene: in-situ DRIFTS and DFT study
Source: Royal Society of Chemistry journal article supplement (doi:10.1039/c7cy01556a), 2017-01-01
Supplement: c7cy01556a1.pdf [file c7cy01556a1.pdf]

**SI: Surface chemistry of MgO/SiO<sub>2</sub> catalysts during the ethanol catalytic conversion to 1,3-butadiene: *in situ* DRIFTS and DFT study**

William E. Taifan, George X. Yan and Jonas Baltrusaitis\*

Department of Chemical and Biomolecular Engineering, Lehigh University, B336 Iacocca Hall, 111 Research Drive, Bethlehem, PA 18015, USA

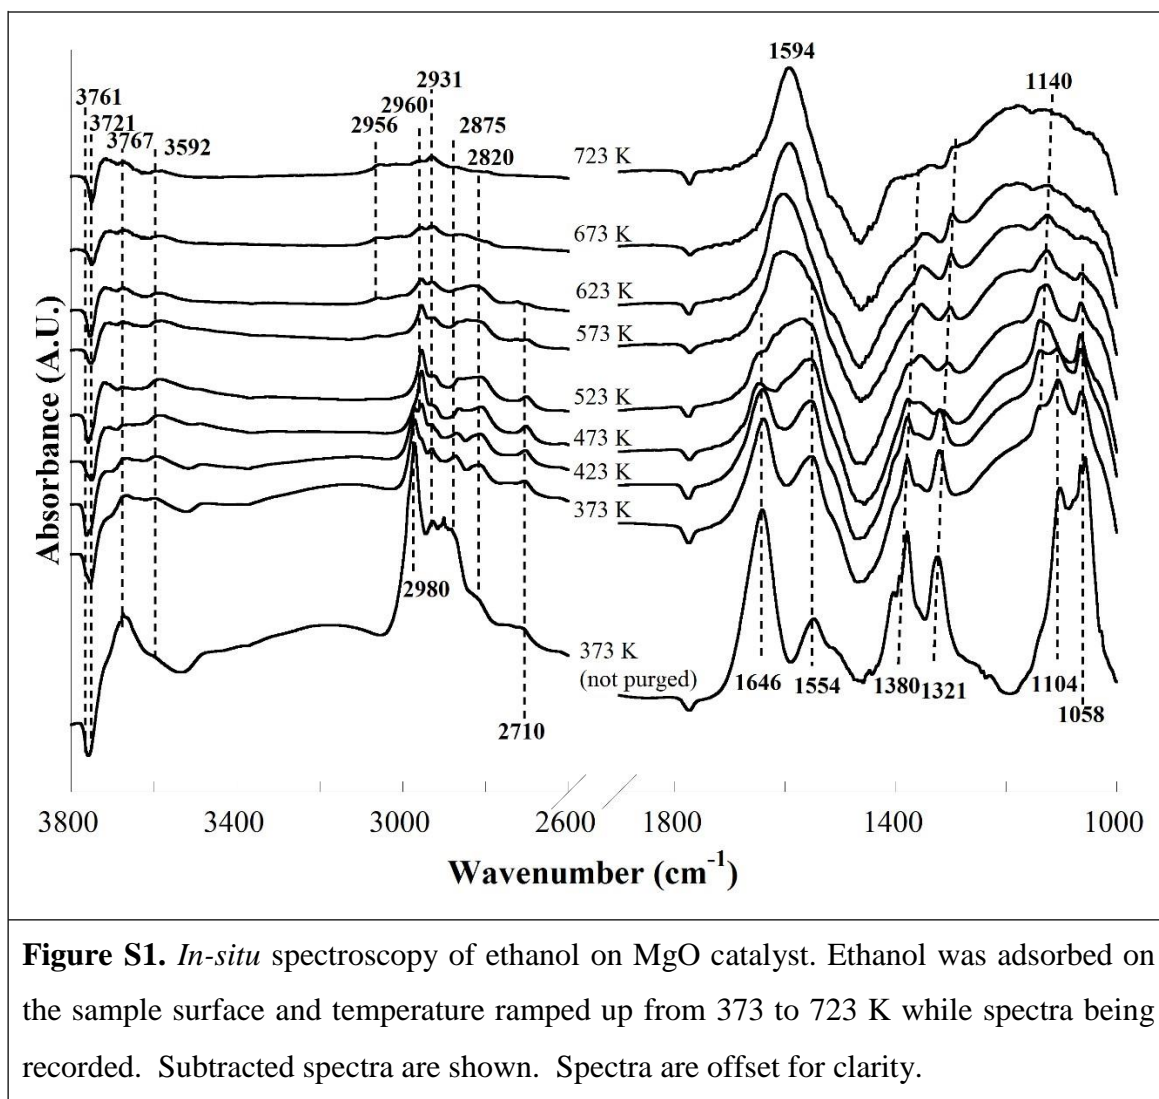

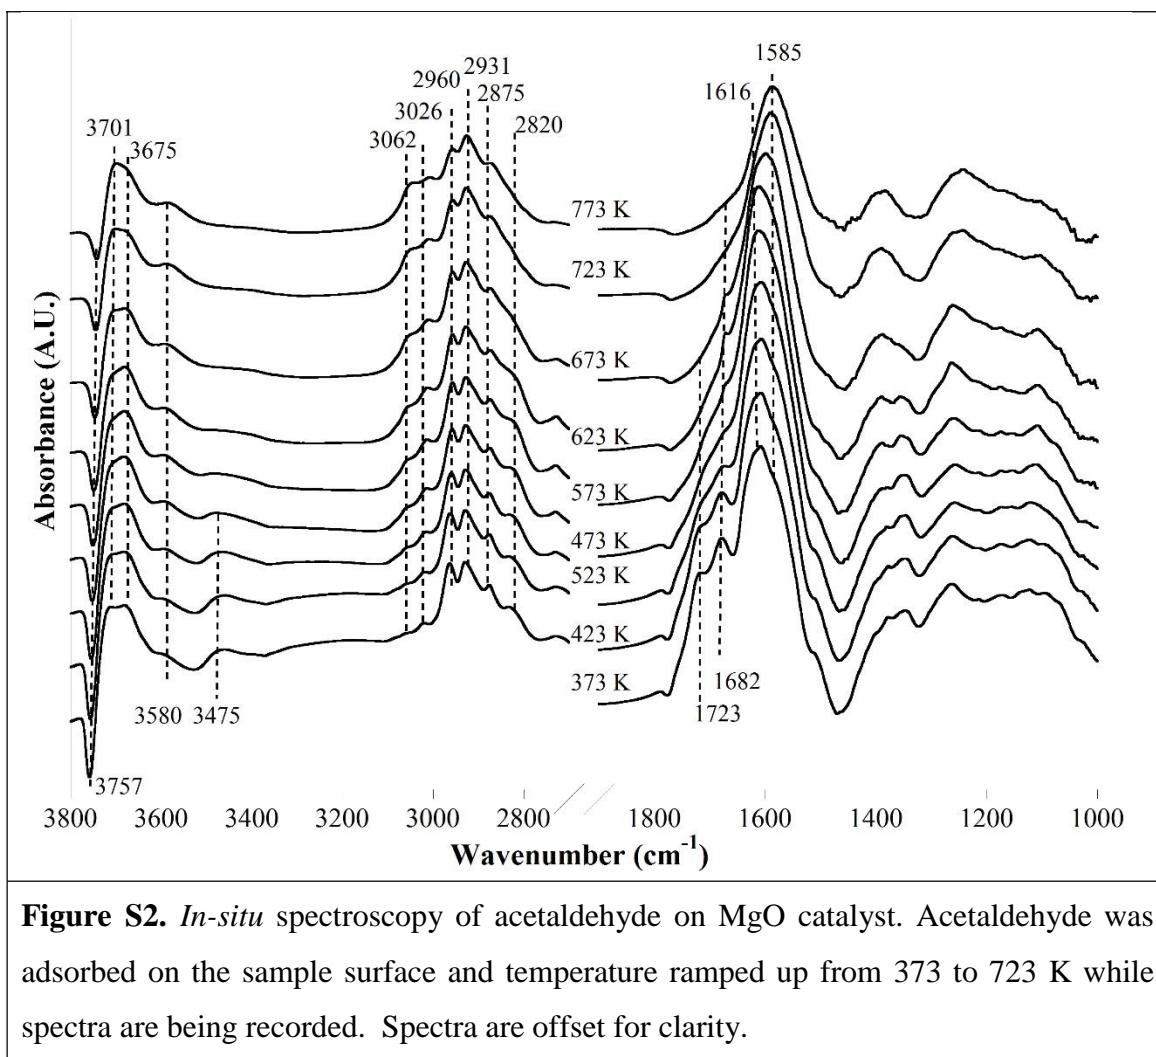

**Table S1.** Calculated infrared frequencies of gas phase ethanol, acetaldehyde, crotyl alcohol and crotonaldehyde molecules. Frequencies were calculated using PBE density functional and no scaling to correct for anharmonicity was applied. Experimental frequencies, except for crotonaldehyde, were obtained from NIST.<sup>68</sup>

| Vibration                                     | Ethanol                           |                        | Acetaldehyde                      |                        | Crotyl alcohol                           |                        | Crotonaldehyde                    |                        |
|-----------------------------------------------|-----------------------------------|------------------------|-----------------------------------|------------------------|------------------------------------------|------------------------|-----------------------------------|------------------------|
|                                               | DFT Frequency (cm <sup>-1</sup> ) | IR (cm <sup>-1</sup> ) | DFT Frequency (cm <sup>-1</sup> ) | IR (cm <sup>-1</sup> ) | DFT Frequency (cm <sup>-1</sup> )        | IR (cm <sup>-1</sup> ) | DFT Frequency (cm <sup>-1</sup> ) | IR (cm <sup>-1</sup> ) |
| $\nu$ (OH)                                    | 3718                              | 3686                   | -                                 | -                      | 3702                                     | 3665                   | -                                 | -                      |
| $\nu$ CH <sub>3</sub>                         | 3053, 3038, 2966                  | 3035, 3012, 2960       | 3092, 3025, 2967                  | 3024, 2996, 2967       | 3008, 2959                               | 2970                   | 3068, 3011, 2965,                 | 2984                   |
| $\nu$ CH <sub>2</sub>                         | 3011, 2925                        | 3008, 2905             | -                                 | -                      | 3000, 2928                               | 2940, 2880             | -                                 | -                      |
| $\nu$ CH                                      | -                                 | -                      | 2790                              | 2840                   | 3062, 3055, 3037                         | 3030                   | 3095, 3065, 3042, 2788            | 3044, 3007, 2750, 2828 |
| $\nu$ (C=O)                                   | -                                 | -                      | 1749                              | 1743                   | -                                        | -                      | 1691                              | 1693                   |
| $\nu$ (C=C)                                   | -                                 | -                      | -                                 | -                      | 1675                                     | 1675                   | 1644                              | 1645                   |
| $\delta$ (CH <sub>2</sub> , CH <sub>3</sub> ) | 1463                              | 1456                   | 1413, 1406                        | 1410, 1390             | 1448, 1439, 1425, 1359                   | 1480, 1435, 1415, 1338 | 1430, 1420, 1353                  | 1449, 1398, 1381       |
| $\delta$ (OH)                                 | 1325                              | 1391                   | -                                 | -                      | -                                        | -                      | -                                 | -                      |
| $\delta$ (COH)                                | -                                 | -                      | -                                 | -                      | -                                        | -                      | 1367                              | Not observed           |
| $\delta$ (CCH)                                | 1237                              | 1242                   | -                                 | -                      | -                                        | -                      | 1288                              | Not observed           |
| Combination bending                           | -                                 | -                      | -                                 | -                      | 1362, 1313, 1285, 1261, 1170, 1115, 1024 | 1384, 1290, 1250, 1180 | 1236                              | Not observed           |

|                       |              |   |               |      |               |      |               |            |
|-----------------------|--------------|---|---------------|------|---------------|------|---------------|------------|
| Combination stretch   | -            | - | -             | -    | 1075          | 1080 | 1142, 1086    | 1151, 1082 |
| $\nu$ (CO)            | 1027         | - | -             | -    | 981           | 970  | -             | -          |
| $\nu$ C-C (C=C)       | 863          | - | 1095          | 1122 | -             | -    | -             | -          |
| <b>Scaling factor</b> | <b>0.997</b> |   | <b>0.9962</b> |      | <b>0.9903</b> |      | <b>0.9996</b> |            |
